# Supplementary material for: A simple method to regulate surface hydroxy groups on Al2O3 for improving catalytic oxidation performance for HCHO on Pt/Al2O3
Source: Royal Society of Chemistry journal article supplement (doi:10.1039/d2cy01275h), 2022-01-01
Supplement: d2cy01275h1.pdf [file d2cy01275h1.pdf]

**ELECTRONIC SUPPLEMENTARY INFORMATION**

**A simple method to regulate surface hydroxy groups on Al<sub>2</sub>O<sub>3</sub> for  
improving catalytic oxidation performance for HCHO on Pt/Al<sub>2</sub>O<sub>3</sub>**

*Zhilin Zhang<sup>a, b</sup>, Jinzhu Ma<sup>a, b, c\*</sup>, Hong He<sup>a, b, c</sup>*

*<sup>a</sup> State Key Joint Laboratory of Environment Simulation and Pollution Control,  
Research Center for Eco-Environmental Sciences, Chinese Academy of Sciences,  
Beijing 100085, China*

*<sup>b</sup> University of Chinese Academy of Sciences, Beijing 100049, China*

*<sup>c</sup> Center for Excellence in Regional Atmospheric Environment and Key Laboratory of  
Urban Pollutant Conversion, Institute of Urban Environment, Chinese Academy of  
Sciences, Xiamen 361021, China*

**\*Corresponding author: Jinzhu Ma [jzma@rcees.ac.cn](mailto:jzma@rcees.ac.cn)**

## Experiment Section

**Catalyst Characterization.** X-ray diffraction (XRD) patterns of the support and catalyst samples were collected with a Bruker D8 X-ray diffractometer with a Cu K $\alpha$  radiation source ( $\lambda = 0.15406$  nm). The patterns were measured over the  $2\theta$  range from  $10^\circ$  to  $90^\circ$  at a scan step of  $0.02^\circ$ .

The specific surface area and pore characterization of the samples was obtained at  $-196^\circ\text{C}$  over the whole range of relative pressures, using a Micromeritics ASAP 2460 analyzer. Prior to the N<sub>2</sub> physisorption, the samples were degassed at  $300^\circ\text{C}$  for 4 h.

Scanning electron microscope (SEM) images were collected on a ZEISS Sigma 500 operated at 3 kV. High resolution transmission electron microscope (HRTEM) images were collected on a JEOL JEM-2100 Plus and JEOL JEM 3200Fs operated at 300 kV.

The actual contents of Pt and Na in catalysts were analyzed using an inductively coupled plasma optical emission spectrometer (ICP-OES).

High-angle annular dark-field scanning transmission electron microscopy (HAADF-STEM) was performed on a JEOL JEM-ARM 200F with Cs-corrected probe operated at 200 kV.

The in situ diffuse reflectance infrared Fourier transform spectroscopy (DRIFTS) was conducted on an is50 (Thermo Nicolet) FTIR equipped with an MCT/A detector. All spectra were recorded in the range of  $4000\text{--}800\text{ cm}^{-1}$  by accumulating 90 scans

with a resolution of  $4\text{ cm}^{-1}$ . A background spectrum was subtracted from each spectrum.

For  $\text{NH}_3$ -DRIFTS, a background spectrum of  $\text{N}_2$  was subtracted from each spectrum. The reduced sample was firstly exposed to a flow of  $\text{NH}_3+\text{N}_2$  (the concentration of  $\text{NH}_3$  was 500 ppm) for 30 min and then purged by  $\text{N}_2$  for 30 min.

For CO-DRIFTS, a background spectrum of  $\text{N}_2$  was subtracted from each spectrum. The reduced sample was firstly exposed to a flow of  $\text{CO}+\text{N}_2$  (the concentration of CO was 250 ppm) for 30 min and then purged by  $\text{N}_2$  for 30 min.

For HCHO-DRIFTS, a background spectrum of  $\text{N}_2$  was subtracted from each spectrum. The reduced sample was exposed to a flow of  $\text{HCHO}+\text{H}_2\text{O}+\text{N}_2$  for 30 min.

CO temperature-programmed reduction (CO-TPR), HCHO temperature-programmed desorption (HCHO-TPD) were performed in a Micromeritics AutoChem II 2920 apparatus, equipped with a computer-controlled CryoCooler, a thermal conductivity detector (TCD) and a mass spectrometer detector (MS).

For CO-TPR-MS, the reduced sample was purged by He. After the gas flow was stabilized, the sample temperature was increased from  $30\text{ }^\circ\text{C}$  to  $500\text{ }^\circ\text{C}$  at a ramping rate of  $10\text{ }^\circ\text{C min}^{-1}$ . The  $\text{CO}_2$  and  $\text{H}_2$  production were monitored by the mass spectrometer detector at a  $m/z$  ratio of 44 and 2, respectively.

For HCHO-TPD-MS, the reduced sample was firstly exposed to a flow containing 20%  $\text{O}_2$ , 35 % water vapor and 110 ppm HCHO for 1 h at room temperature in the fixed-bed quartz flow reactor. After that, the sample was transformed to the sample

warehouse of Micromeritics AutoChem II 2920 instrument and the temperature was cooled down to 25 °C in He gas flow. The sample was subjected to a He purge for 30 min, then HCHO-TPD was conducted in He gas flow from 25 °C to 500 °C at a ramping rate of 10 °C min<sup>-1</sup>. The desorbed H<sub>2</sub>, CO, HCHO and CO<sub>2</sub> were monitored using the mass spectrometer at m/z ratios of 2, 28, 30 and 44, respectively.

**The inlet and outlet gases detector.** The inlet and outlet gases were monitored by FTIR (Nicolet 380) equipped with 2 m gas cell and a DTGS detector; resolution: 0.5 cm<sup>-1</sup>; OPD velocity: 0.4747 cm s<sup>-1</sup>. The collection region was 4000-400 cm<sup>-1</sup> and the number of scans per spectrum was 32. HCHO and CO<sub>2</sub> were measured by the peaks located at 2897 (C-H vibration) and 2350 cm<sup>-1</sup> (O-C-O vibration), respectively. Since no other carbon-containing compounds except for CO<sub>2</sub> were detected in the effluents for all tested catalysts, the HCHO and CO<sub>2</sub> concentrations were quantified and calculated based on the peak area of CO<sub>2</sub> at 2350 cm<sup>-1</sup>. Before the measurement, a CO<sub>2</sub> standard curve was created using the different CO<sub>2</sub> concentrations versus the peak areas at 2350 cm<sup>-1</sup>.

**Table S1.** The specific surface area ( $S_{\text{BET}}$ ) of the supports and catalysts.

| Sample | $S_{\text{BET}}$ ( $\text{m}^2/\text{g}$ ) | Sample      | $S_{\text{BET}}$ ( $\text{m}^2/\text{g}$ ) |
|--------|--------------------------------------------|-------------|--------------------------------------------|
| Al-2h  | 358                                        | Pt-Na/Al-2h | 339                                        |
| Al-3h  | 369                                        | Pt-Na/Al-3h | 341                                        |
| Al-4h  | 365                                        | Pt-Na/Al-4h | 349                                        |
| Al-5h  | 369                                        | Pt-Na/Al-5h | 348                                        |

**Table S2.** Pt content and Na content of Pt-Na/Al-2h, Pt-Na/Al-3h, Pt-Na/Al-4h and Pt-Na/Al-5h.

| Sample      | Pt content (%) | Na content (%) |
|-------------|----------------|----------------|
| Pt-Na/Al-2h | 0.05           | 0.85           |
| Pt-Na/Al-3h | 0.05           | 0.84           |
| Pt-Na/Al-4h | 0.05           | 0.86           |
| Pt-Na/Al-5h | 0.05           | 0.86           |

**Table S3.** NH<sub>3</sub>-DRIFTS results of Al-x supports and Pt-Na/Al-x catalysts.

| Sample      | Wavenumbers and Related Content (%) |                            |                            |                       |
|-------------|-------------------------------------|----------------------------|----------------------------|-----------------------|
|             | 3761 cm <sup>-1</sup>               | 3752 cm <sup>-1</sup>      | 3736 cm <sup>-1</sup>      | 3677 cm <sup>-1</sup> |
|             | HO-μ <sub>ter</sub>                 | HO-μ <sub>bri(Na-Al)</sub> | HO-μ <sub>bri(Al-Al)</sub> | HO-μ <sub>tri</sub>   |
| Al-5h       | 27.7                                | -                          | 49.7                       | 22.6                  |
| Al-4h       | 29.1                                | -                          | 50.3                       | 20.6                  |
| Al-3h       | 19.8                                | -                          | 57.1                       | 23.2                  |
| Al-2h       | -                                   | -                          | 65.1                       | 34.9                  |
| Pt-Na/Al-5h | -                                   | 70.2                       | 13.5                       | 16.3                  |
| Pt-Na/Al-4h | -                                   | 64.6                       | 19.2                       | 16.2                  |
| Pt-Na/Al-3h | -                                   | 46.4                       | 30.1                       | 23.5                  |
| Pt-Na/Al-2h | -                                   | 42.5                       | 29.3                       | 28.2                  |

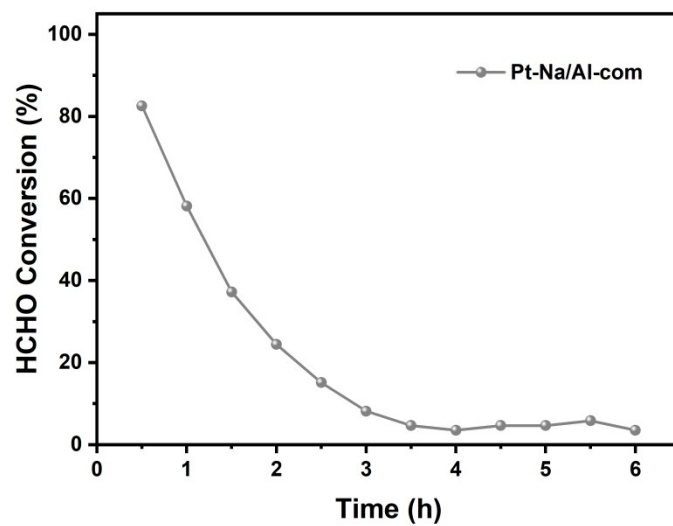

**Figure S1.** HCHO catalytic oxidation performance of Pt-Na/Al-com. Reaction conditions: 25 °C, 110 ppm of HCHO, 20 vol % O<sub>2</sub>, 35 % RH, N<sub>2</sub> balanced and WHSV of 200 000 mL/ (g h).

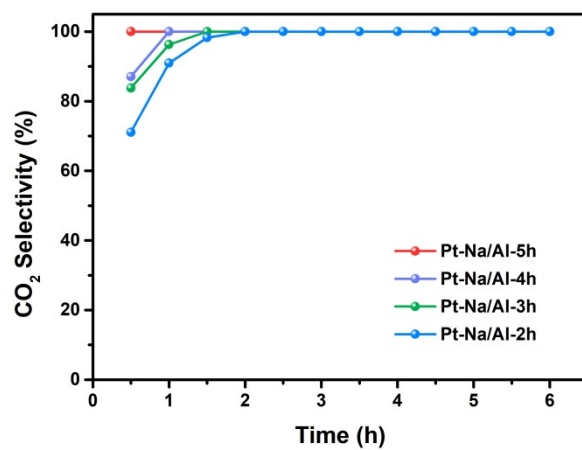

**Figure S2.** CO<sub>2</sub> selectivity of Pt-Na/Al-2h, Pt-Na/Al-3h, Pt-Na/Al-4h and Pt-Na/Al-5h.

Reaction conditions: 25 °C, 110 ppm of HCHO, 20 vol % O<sub>2</sub>, 35 % RH, N<sub>2</sub> balanced and WHSV of 200 000 mL/ (g h).

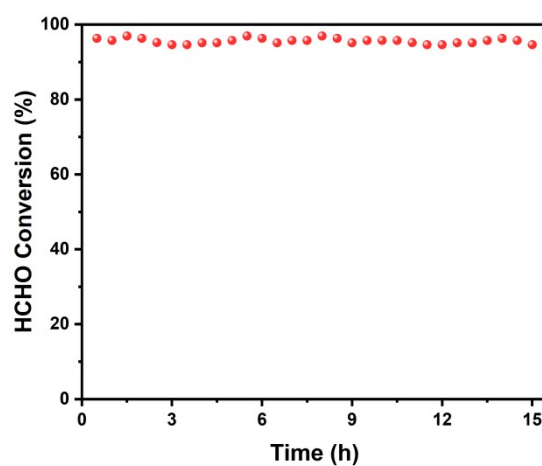

**Figure S3.** The HCHO oxidation stability of Pt-Na/Al-5h. Reaction conditions: 25 °C, 180 ppm of HCHO, 20 vol % O<sub>2</sub>, 35 % RH, N<sub>2</sub> balanced and WHSV of 120 000 mL/(g h).

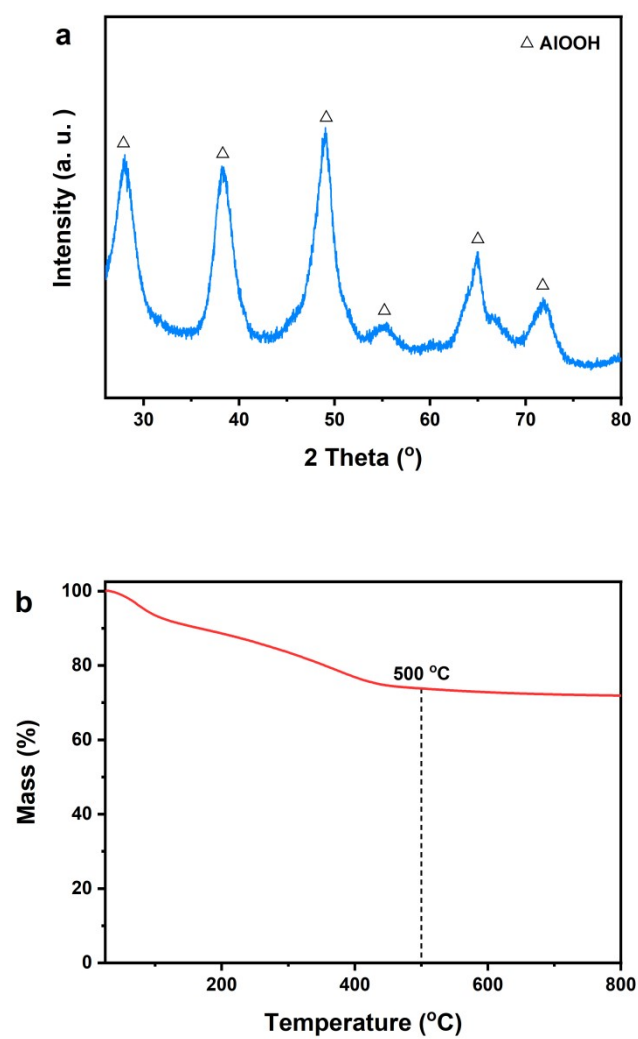

**Figure S4.** The a) XRD pattern and b) TG curve of AlOOH.

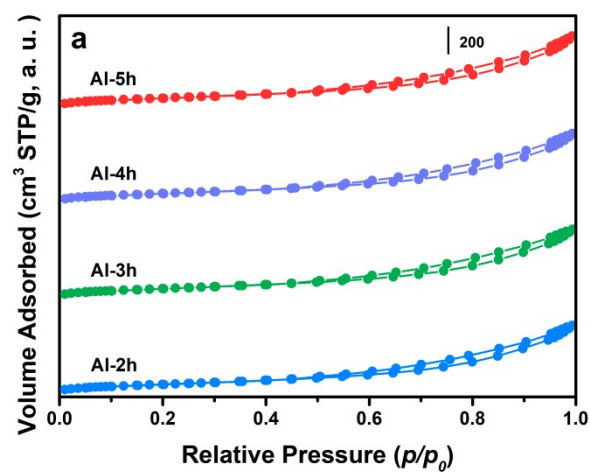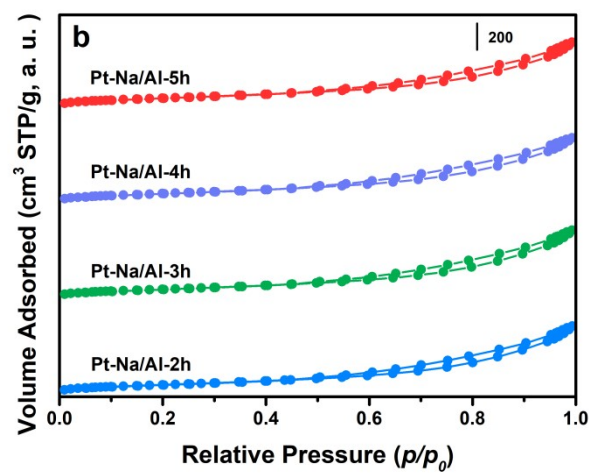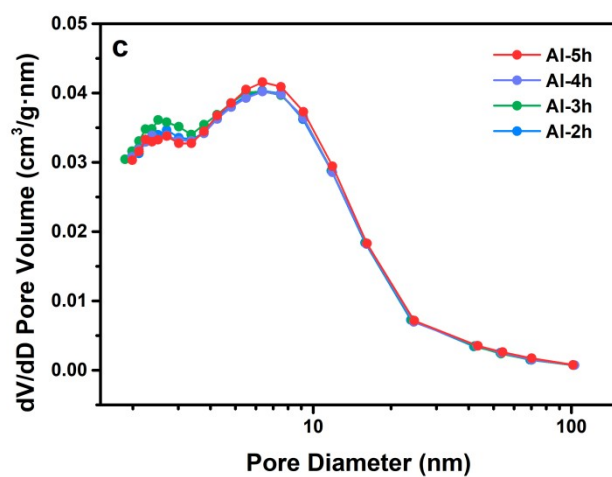

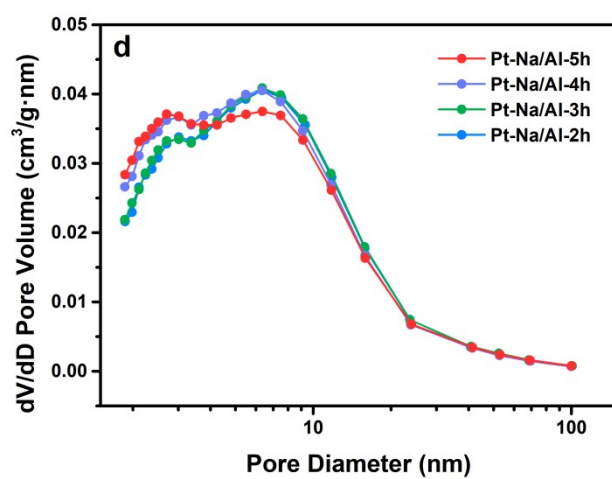

**Figure S5.** N<sub>2</sub> adsorption-desorption isotherms and the corresponding pore size distributions of Al-2h, Al-3h, Al-4h and Al-5h supports, and Pt-Na/Al-2h, Pt-Na/Al-3h, Pt-Na/Al-4h and Pt-Na/Al-5h catalysts.

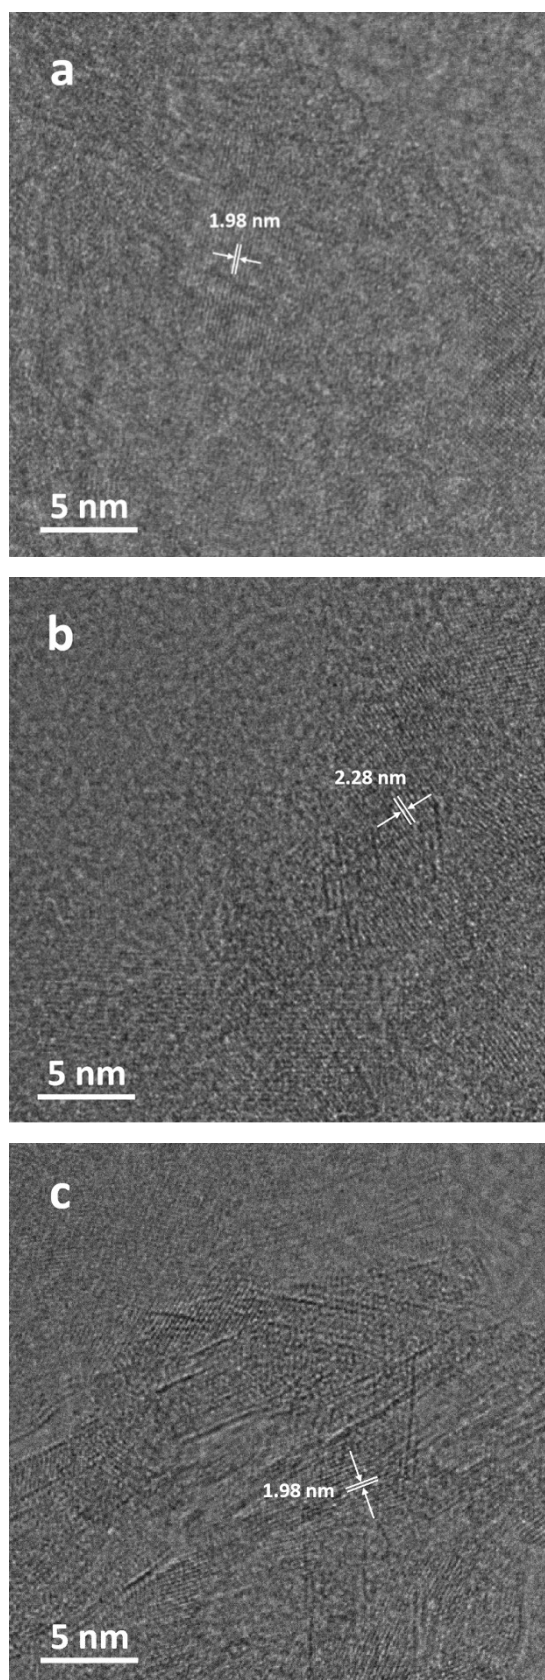

**Figure S6.** HRTEM images of a) AlOOH, b) Al-2h and c) Al-5h supports.

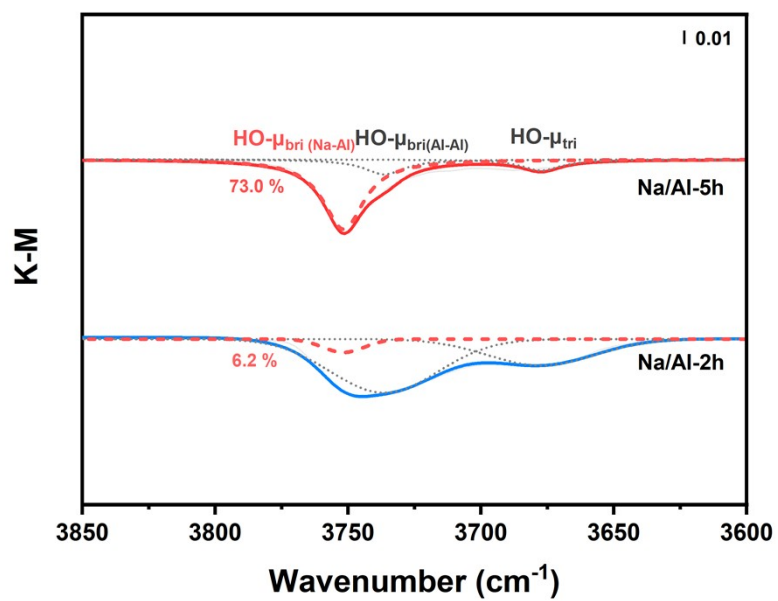

**Figure S7.** In-situ DRIFTS results of  $\text{NH}_3$  adsorption of Na/Al-x samples.

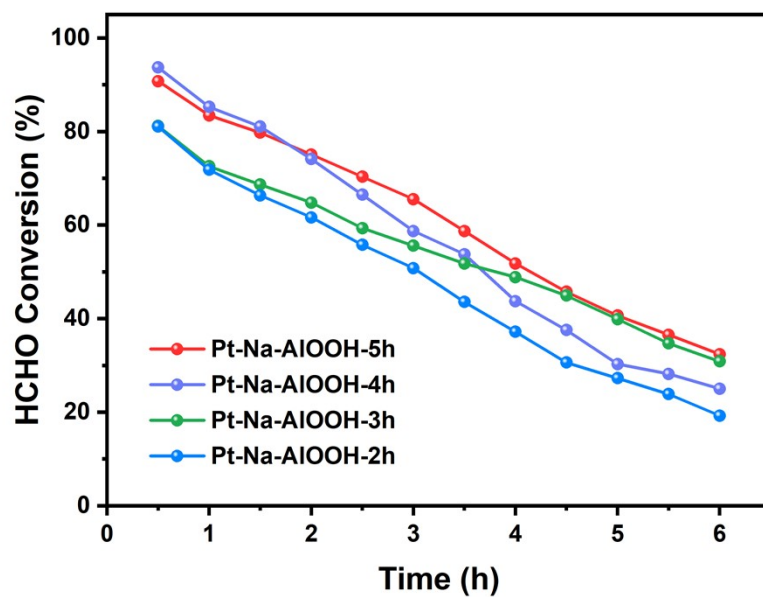

**Figure S8.** HCHO catalytic oxidation performance of Pt-Na-AlOOH-2h, Pt-Na-AlOOH-3h, Pt-Na-AlOOH-4h and Pt-Na-AlOOH-5h. Reaction conditions: 25 °C, 110 ppm of HCHO, 20 vol % O<sub>2</sub>, 35 % RH, N<sub>2</sub> balanced and WHSV of 200 000 mL/ (g h).

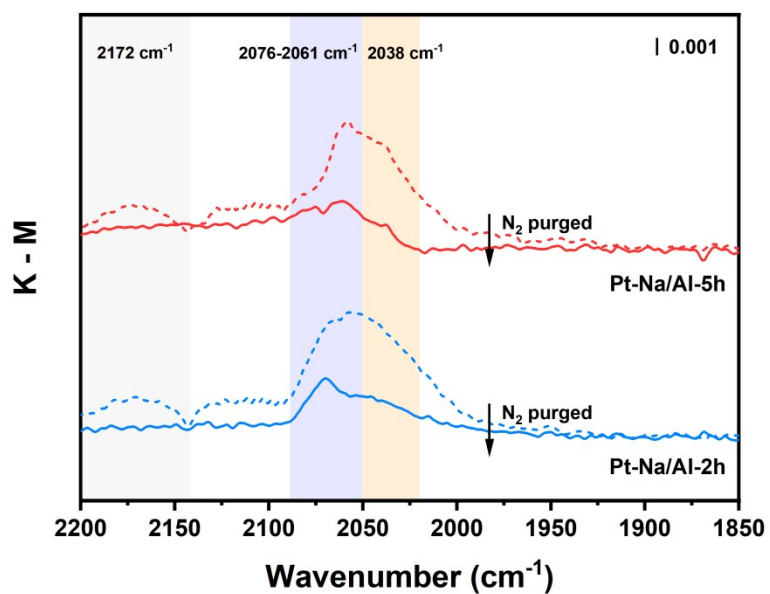

**Figure S9.** In-situ DRIFTS results of Pt-Na/Al-2h and Pt-Na/Al-5h at 30 °C. Reaction condition:  $\text{CO} + \text{N}_2$  adsorption for 30 min,  $\text{N}_2$  purged for 30 min.

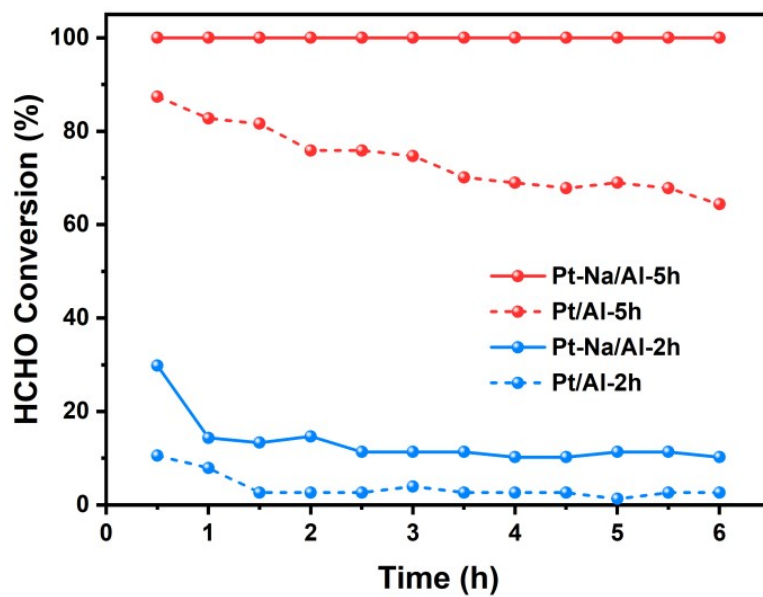

**Figure S10.** HCHO catalytic oxidation performance of Pt-Na/Al-5h, Pt-Na/Al-2h, Pt/Al-5h and Pt/Al-2h. Reaction conditions: 25 °C, 110 ppm of HCHO, 20 vol % O<sub>2</sub>, 35 % RH, N<sub>2</sub> balanced and WHSV of 200 000 mL/ (g h).

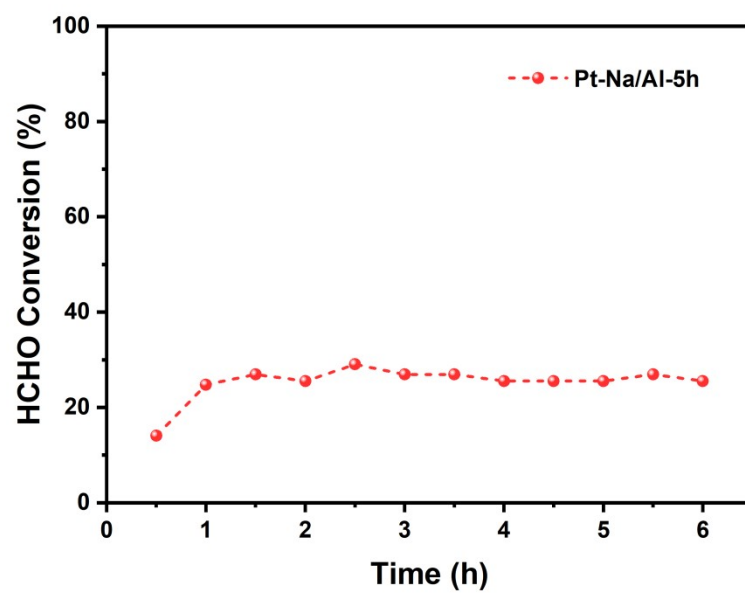

**Figure S11.** HCHO catalytic oxidation performance of Pt-Na/Al-5h. Reaction conditions: 25 °C, 110 ppm of HCHO, 20 vol % O<sub>2</sub>, 0 % RH, N<sub>2</sub> balanced and WHSV of 200 000 mL/ (g h).
